# Supplementary material for: Unveiling spatial complexity in solid tumor immune microenvironments through multiplexed imaging
Source: PubMed Central journal article supplement (PMC10985204; doi:10.3389/fimmu.2024.1383932), 2024-03-19
Supplement: Image_1.pdf [file Image_1.pdf]

Figure S1

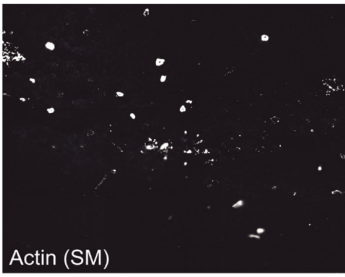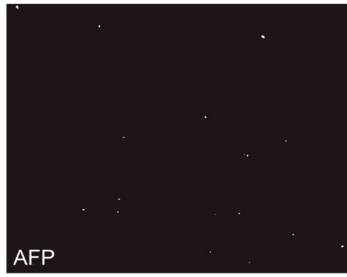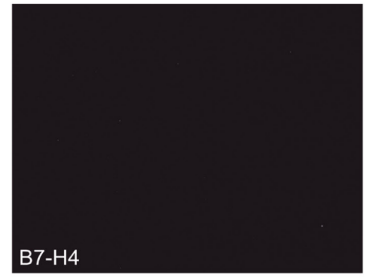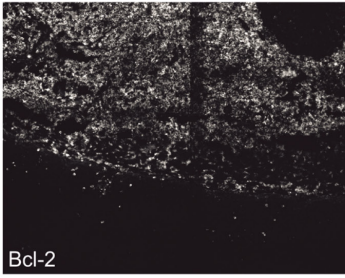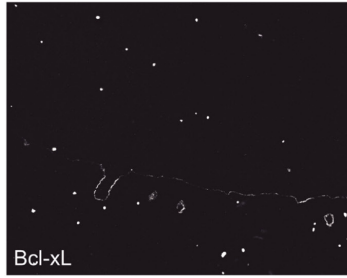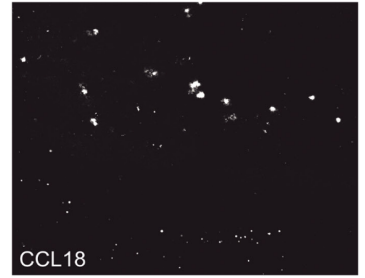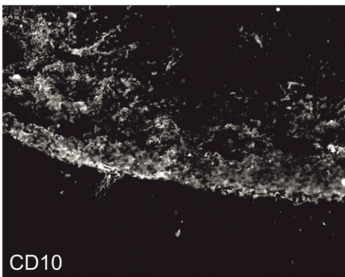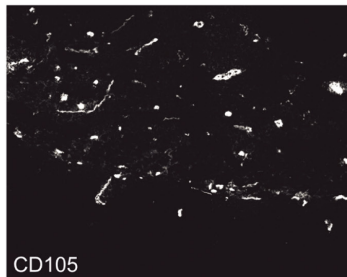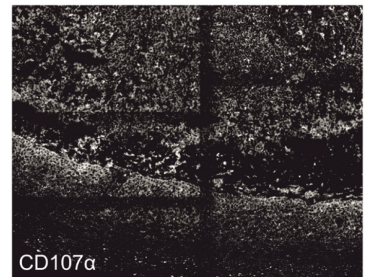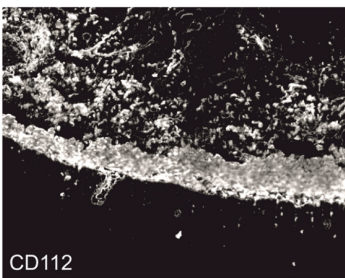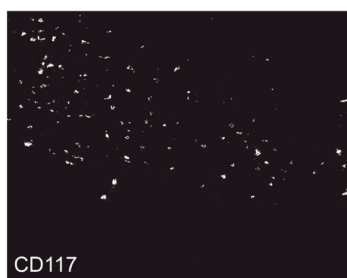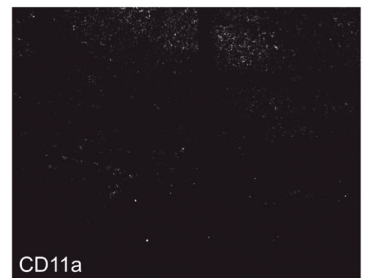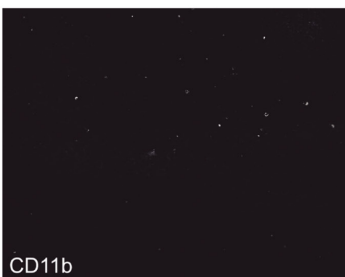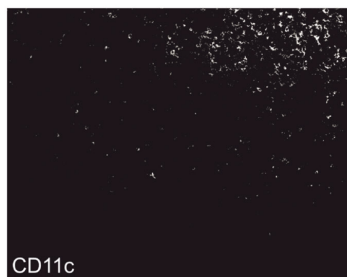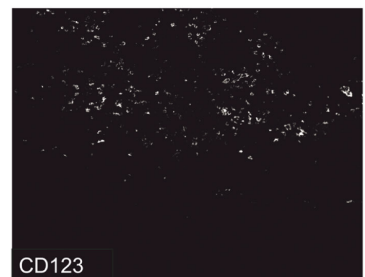

Figure S1

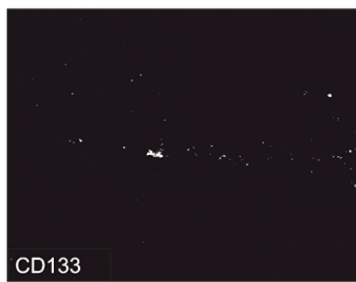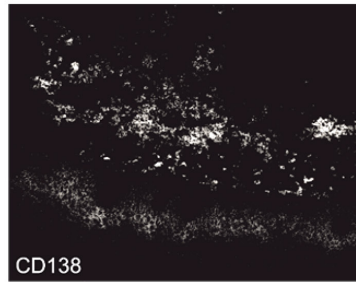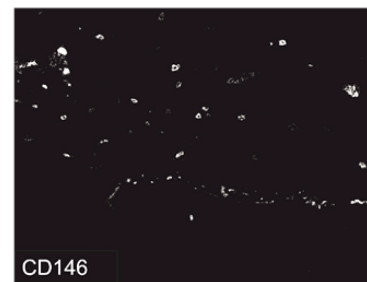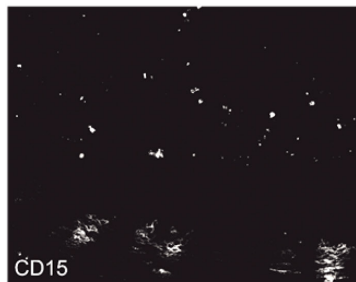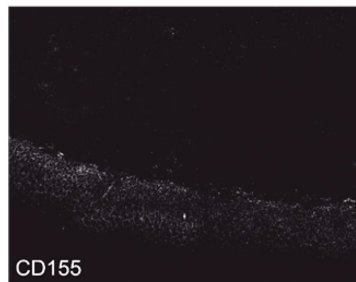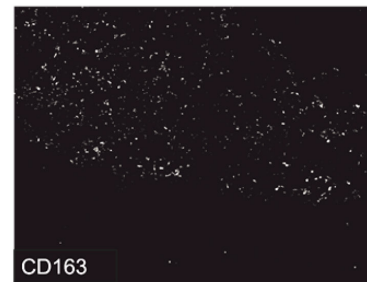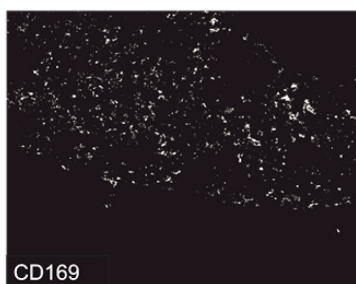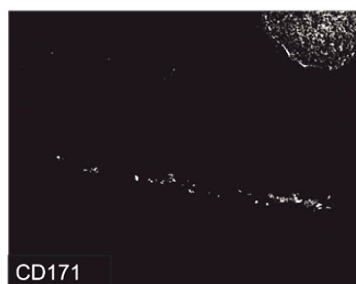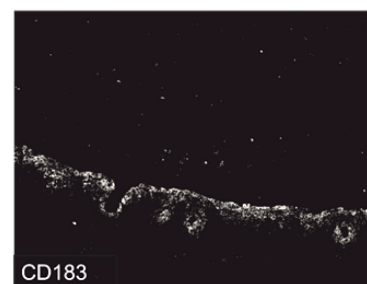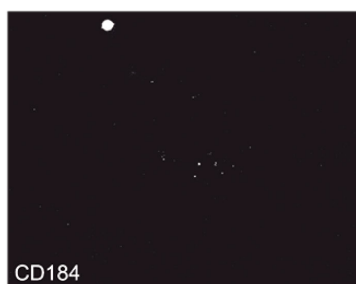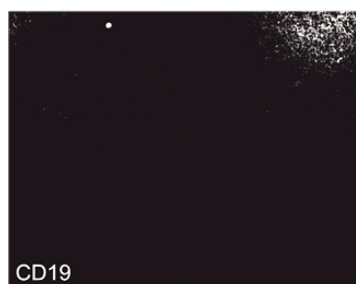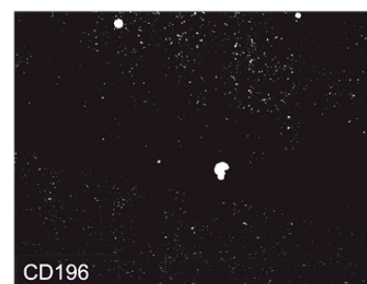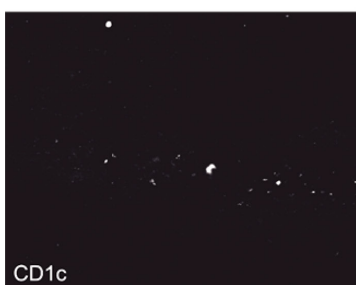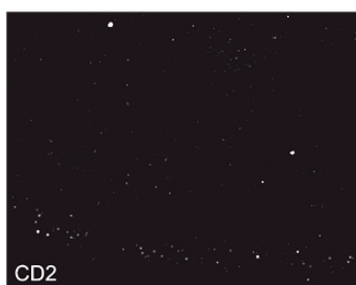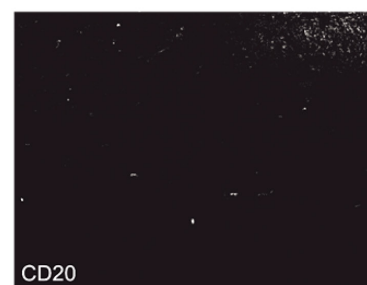

Figure S1

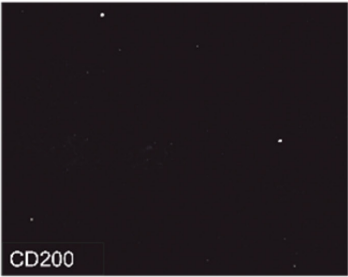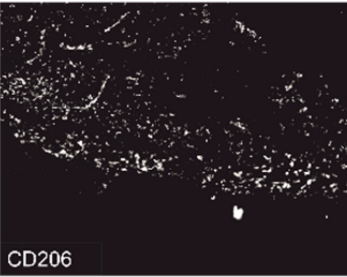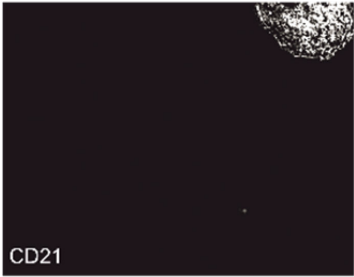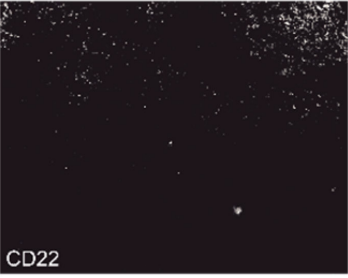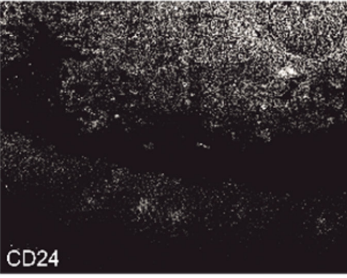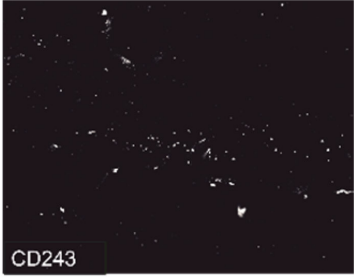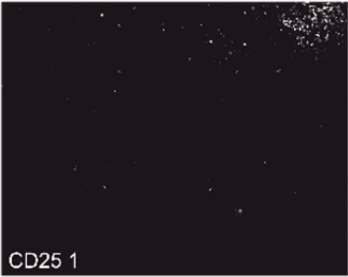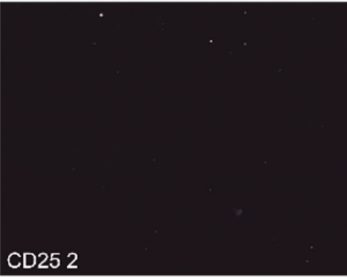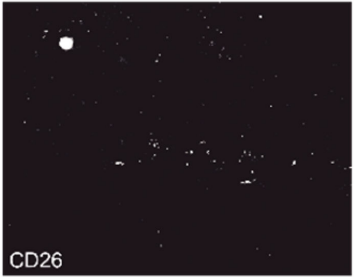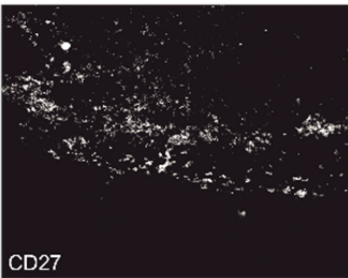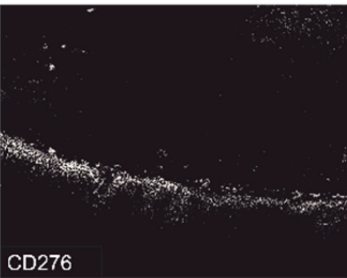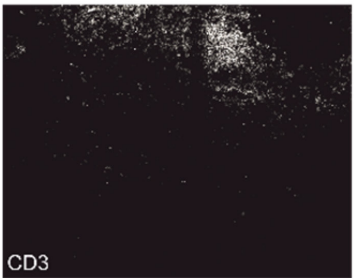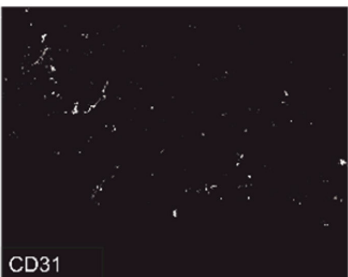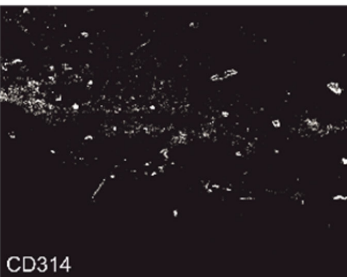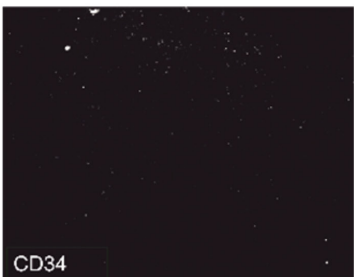

Figure S1

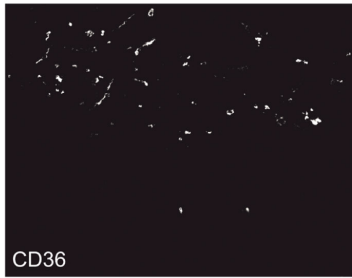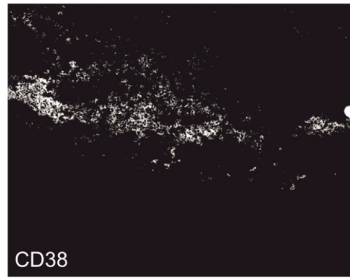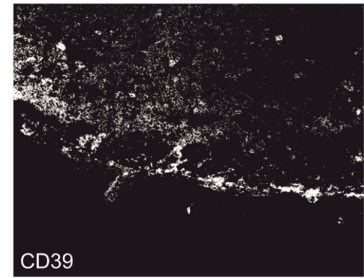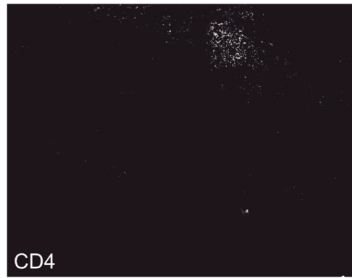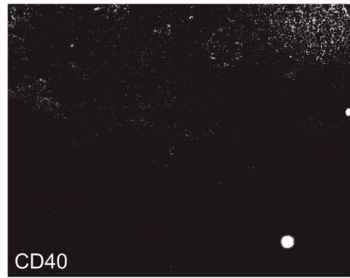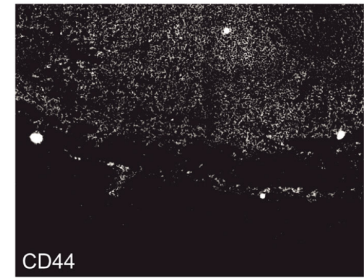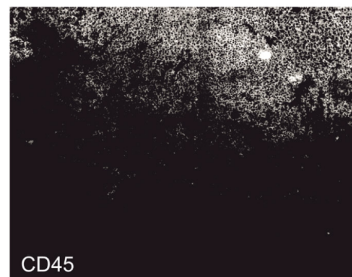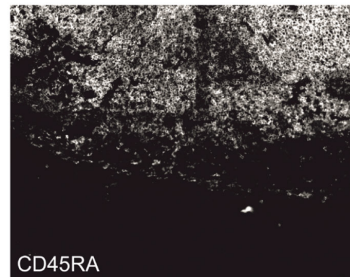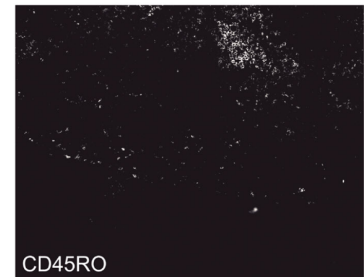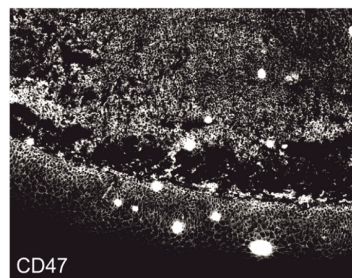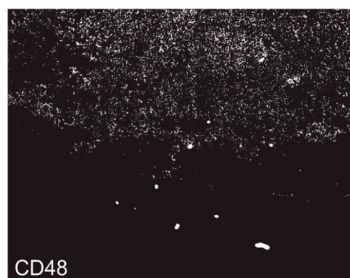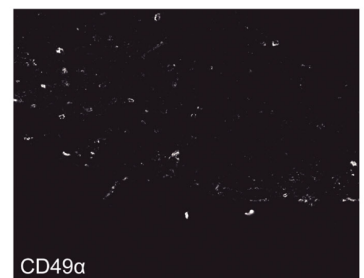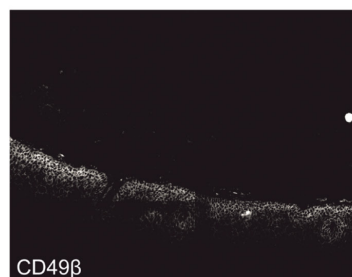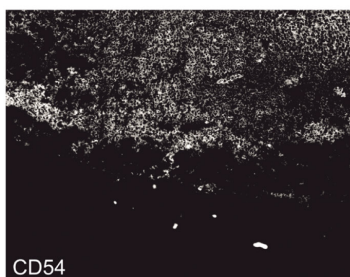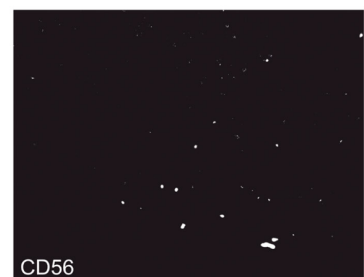



Figure S1

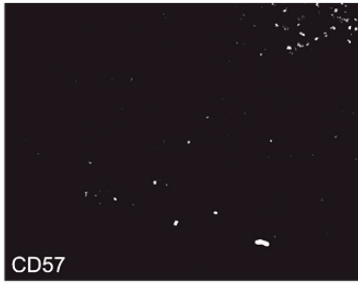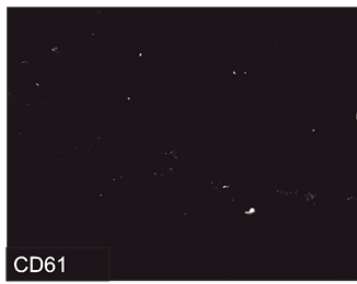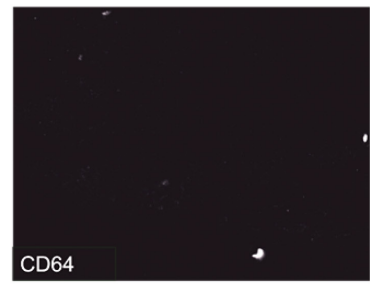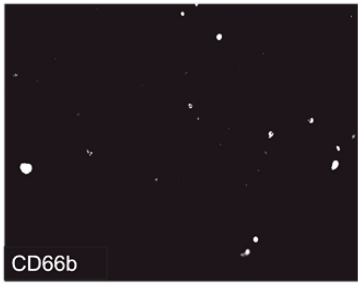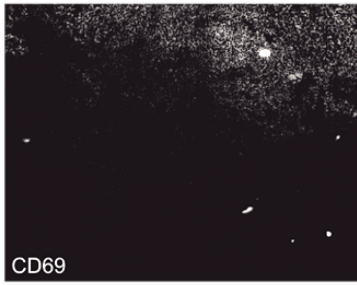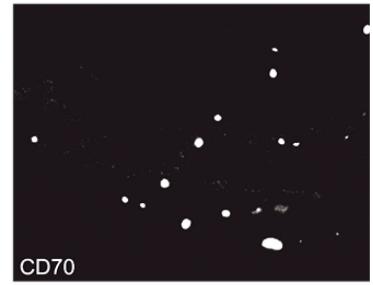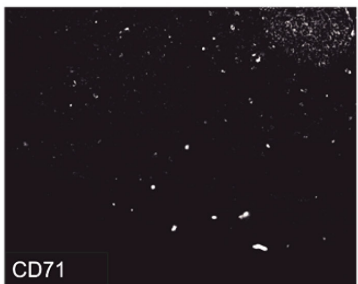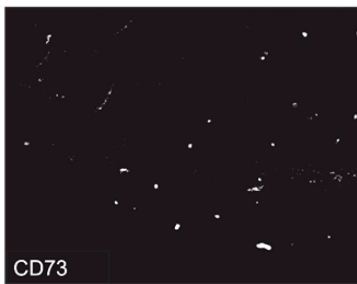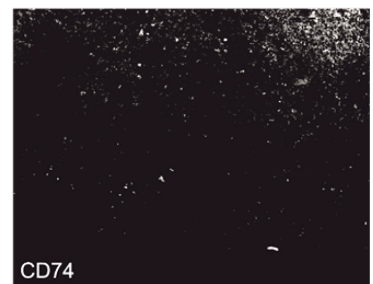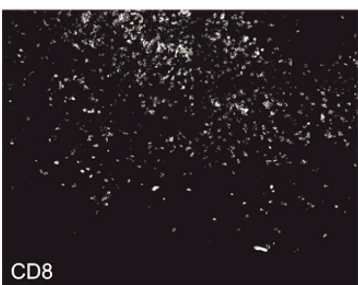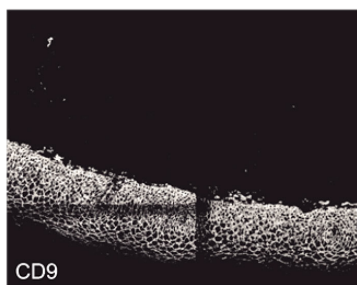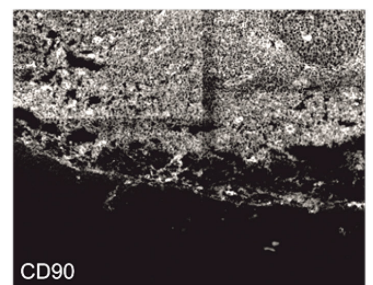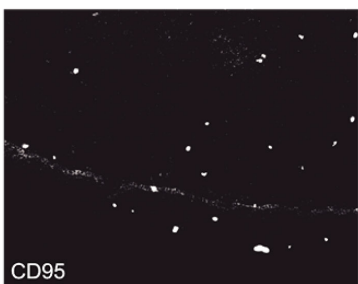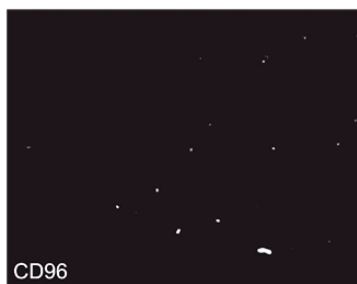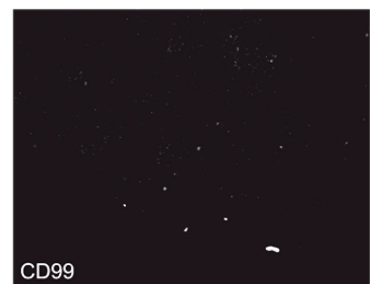

Figure S1

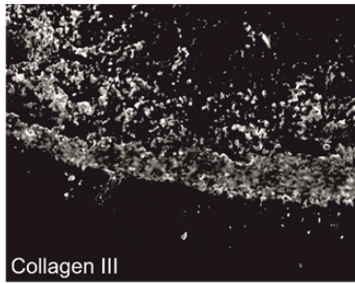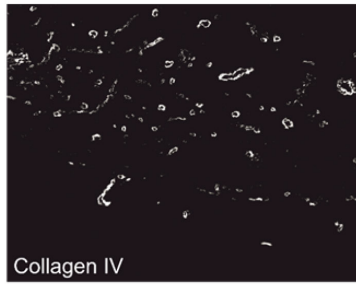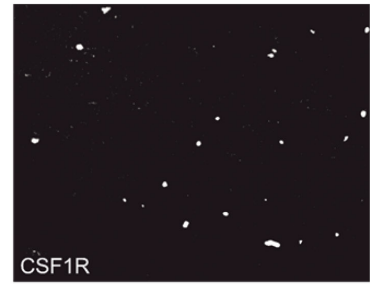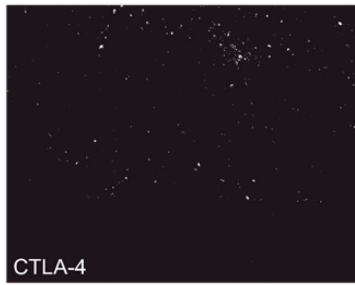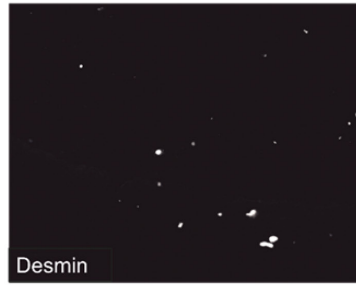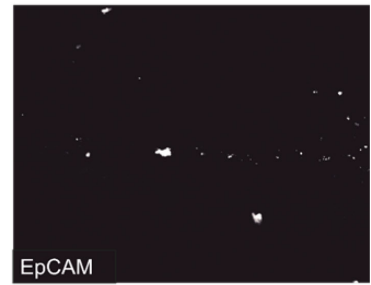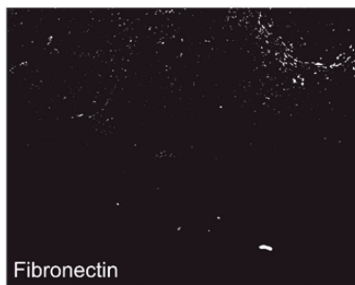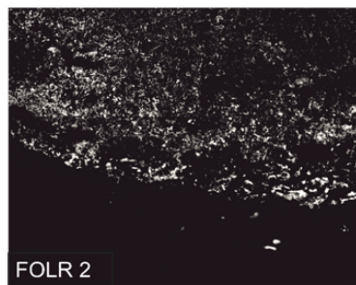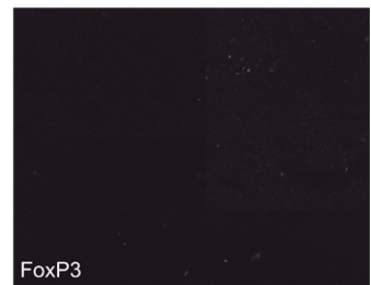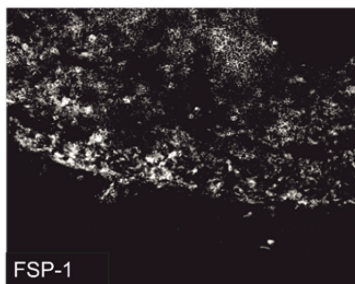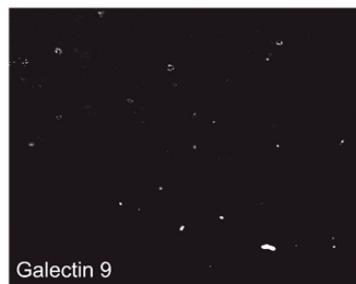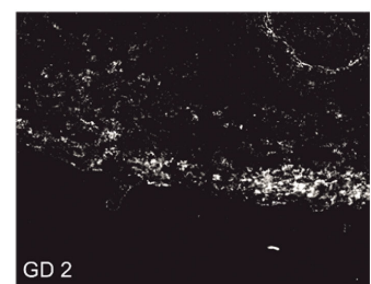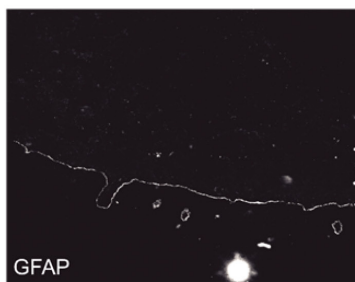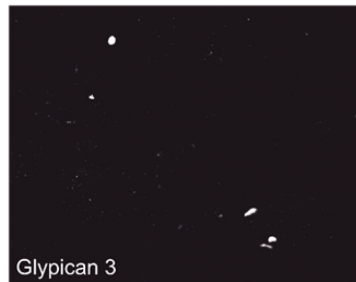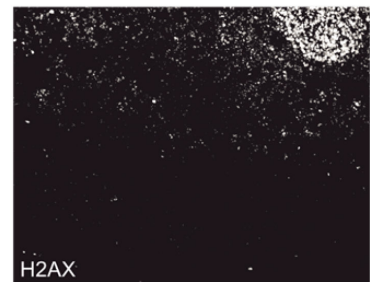

Figure S1

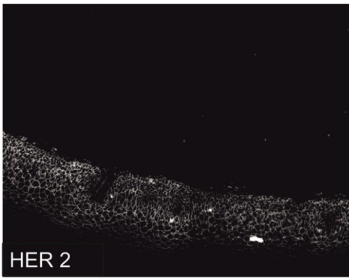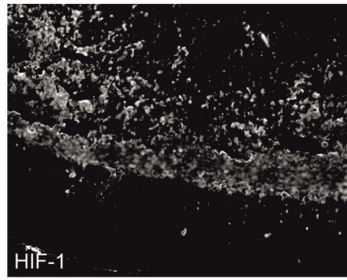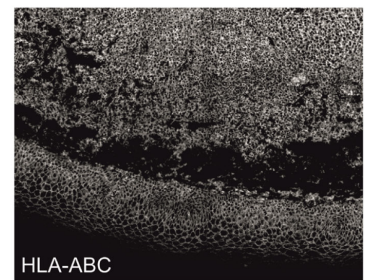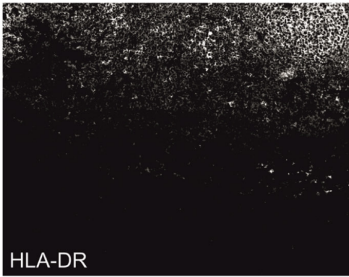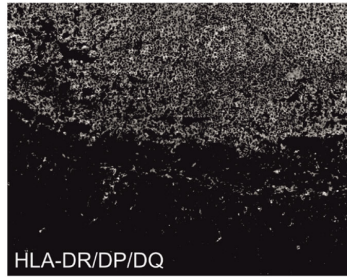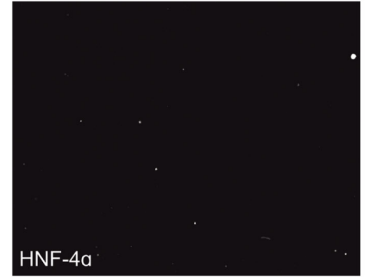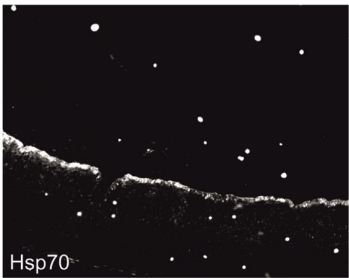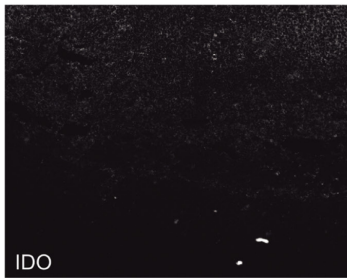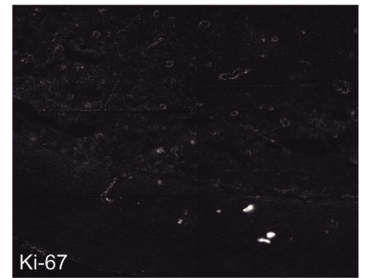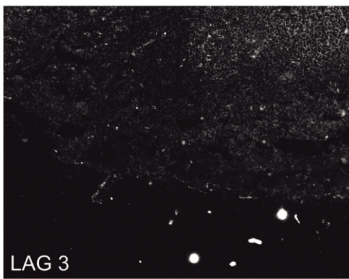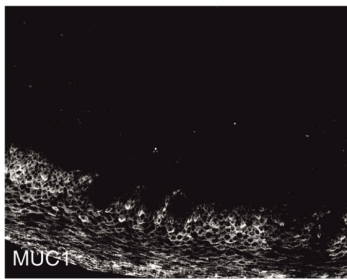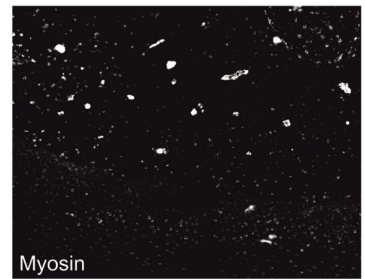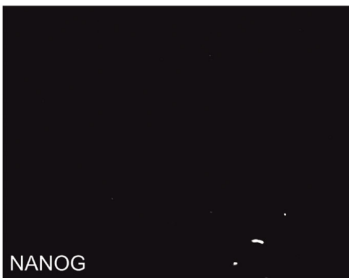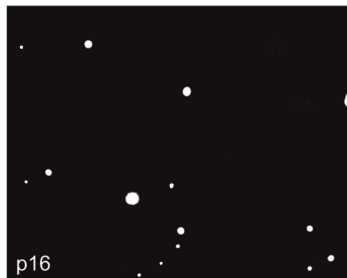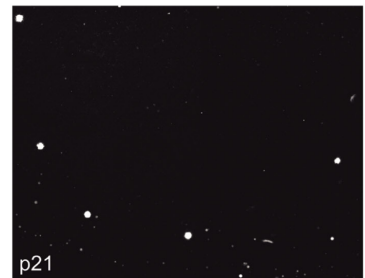



Figure S1

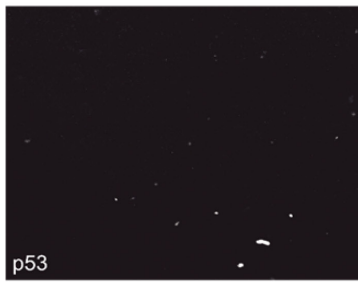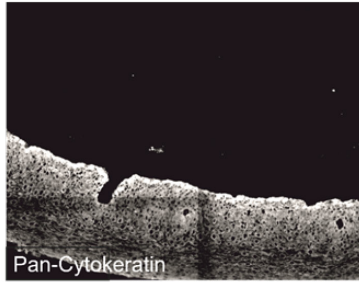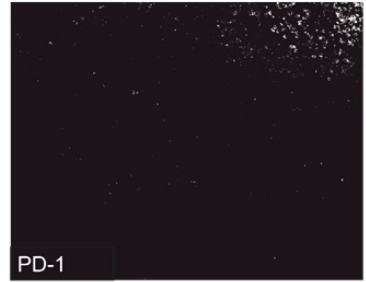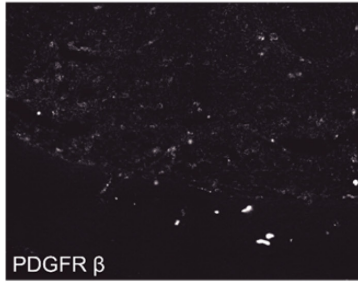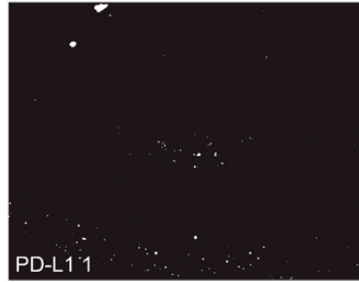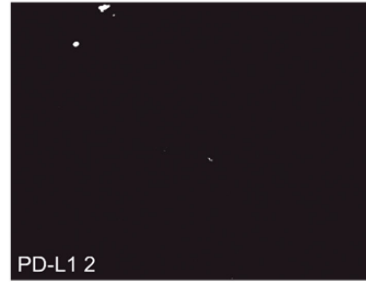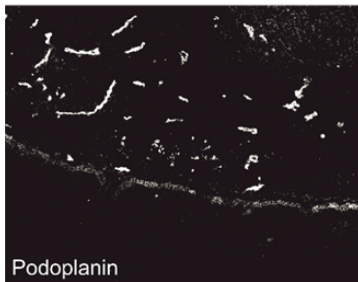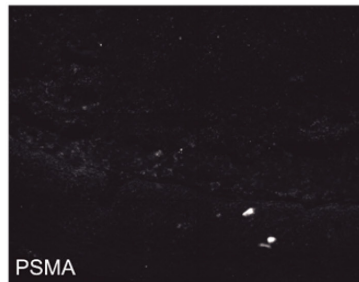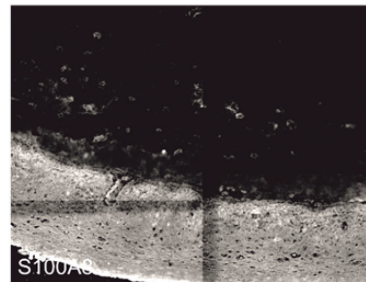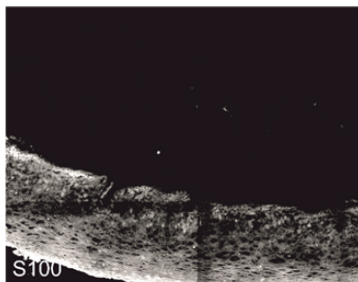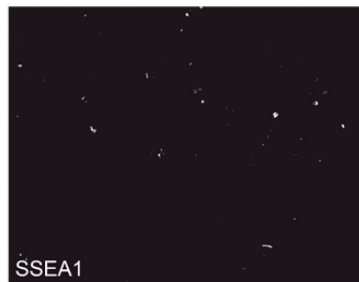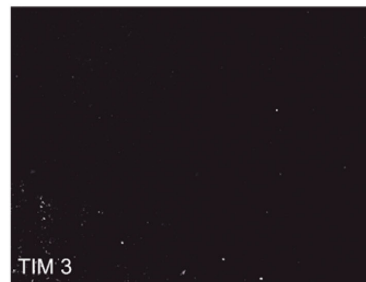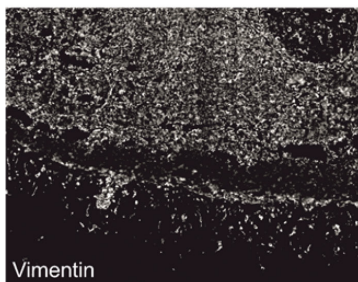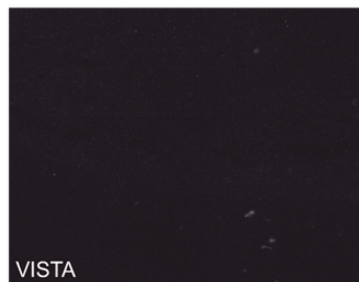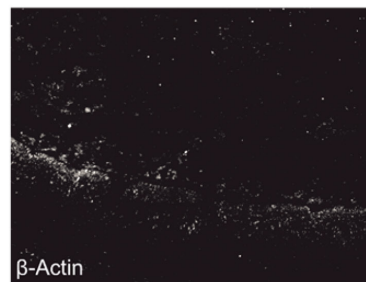



**Figure S1**

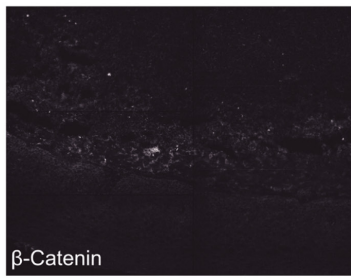

**Supplementary Figure 1: Single staining of immunophenotyping panel on human tonsil tissue.** 121 single staining images of the immunophenotyping panel are depicted.

ROI sizes: 976 x 769  $\mu\text{m}$
