# Supplementary material for: Unveiling spatial complexity in solid tumor immune microenvironments through multiplexed imaging
Source: PubMed Central journal article supplement (PMC10985204; doi:10.3389/fimmu.2024.1383932), 2024-03-19
Supplement: Image_2.pdf [file Image_2.pdf]

**Figure S2**

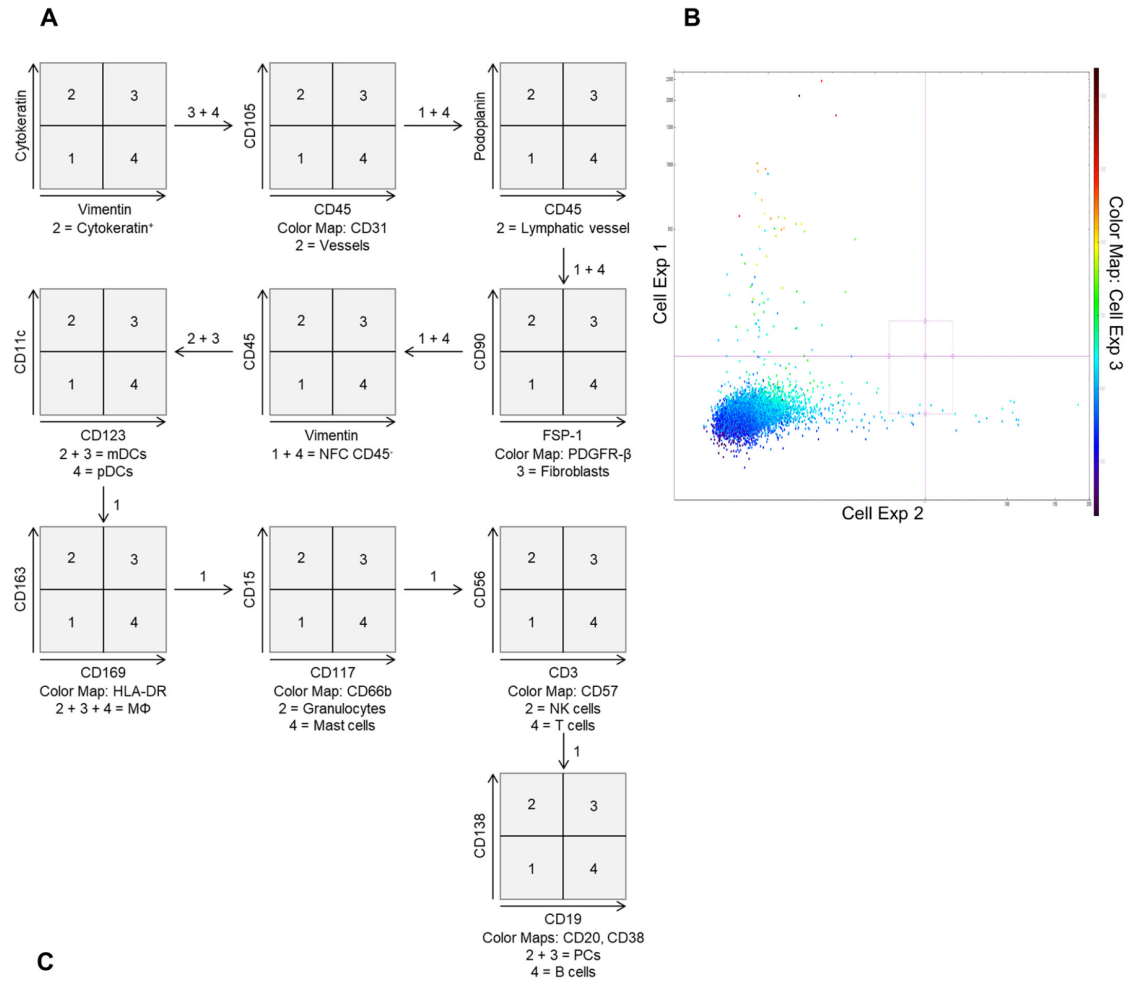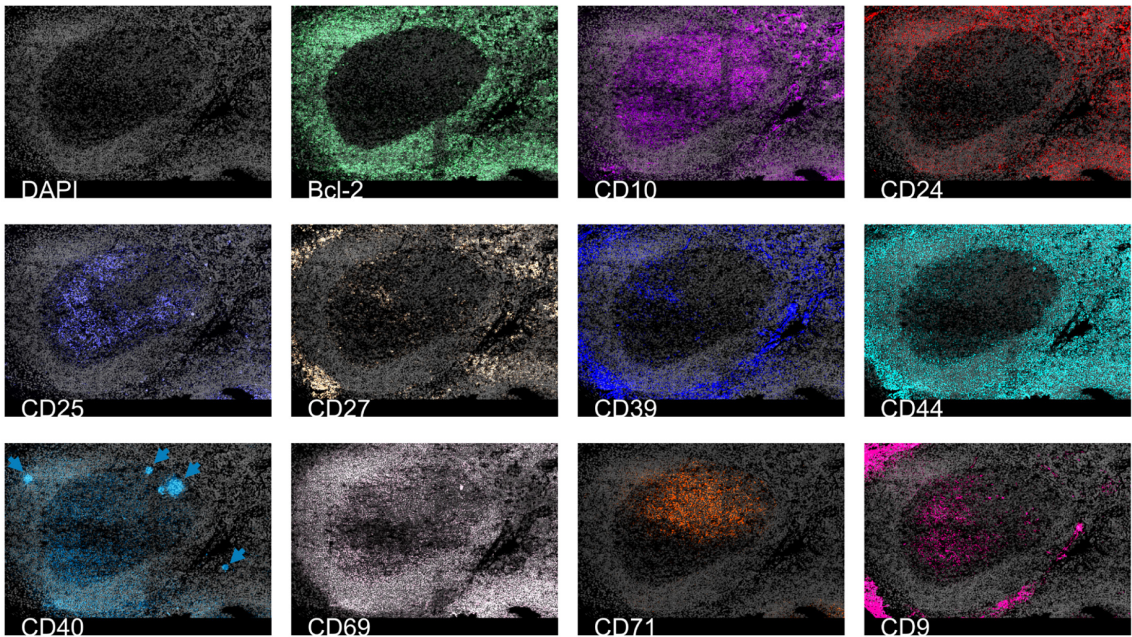

## Supplementary Figure 2:

**Cell type annotation and sub-phenotyping of human tonsil tissue. A** Expert-based gating analysis for immune cells identification which can be applied to segmented cells within MACSiQ View or externally (with exported FCS files). **B** Showing the Color Map function in MACSiQ View which allows for multiparametric gating with more than two markers. **C** Marker expressions used for tonsil sub-phenotyping: mantle zone: CD27<sup>+</sup>, CD39<sup>+</sup>; GC: CD9<sup>+</sup>, CD10<sup>+</sup>, CD171<sup>+</sup>; non-GC: Bcl-2<sup>+</sup>, CD44<sup>+</sup>, B cell activation states (CD25<sup>+</sup>, CD44<sup>+</sup>, CD69<sup>+</sup>) and B cell memory phenotype (CD40<sup>+</sup>).

ROI sizes: 976 x 640  $\mu\text{m}$
