# Supplementary material for: Unveiling spatial complexity in solid tumor immune microenvironments through multiplexed imaging
Source: PubMed Central journal article supplement (PMC10985204; doi:10.3389/fimmu.2024.1383932), 2024-03-19
Supplement: Image_3.pdf [file Image_3.pdf]

**Figure S3**

**A**

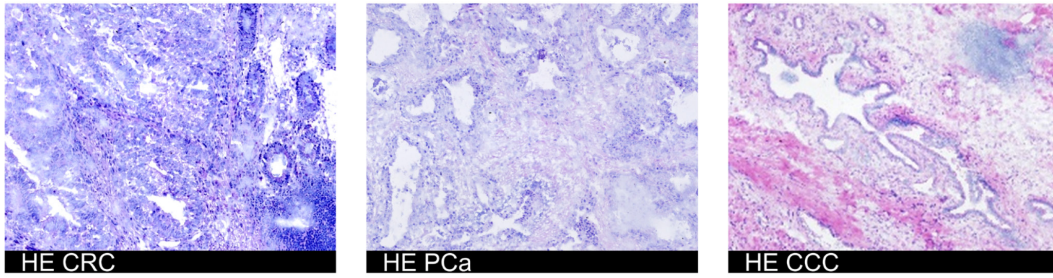

**B**

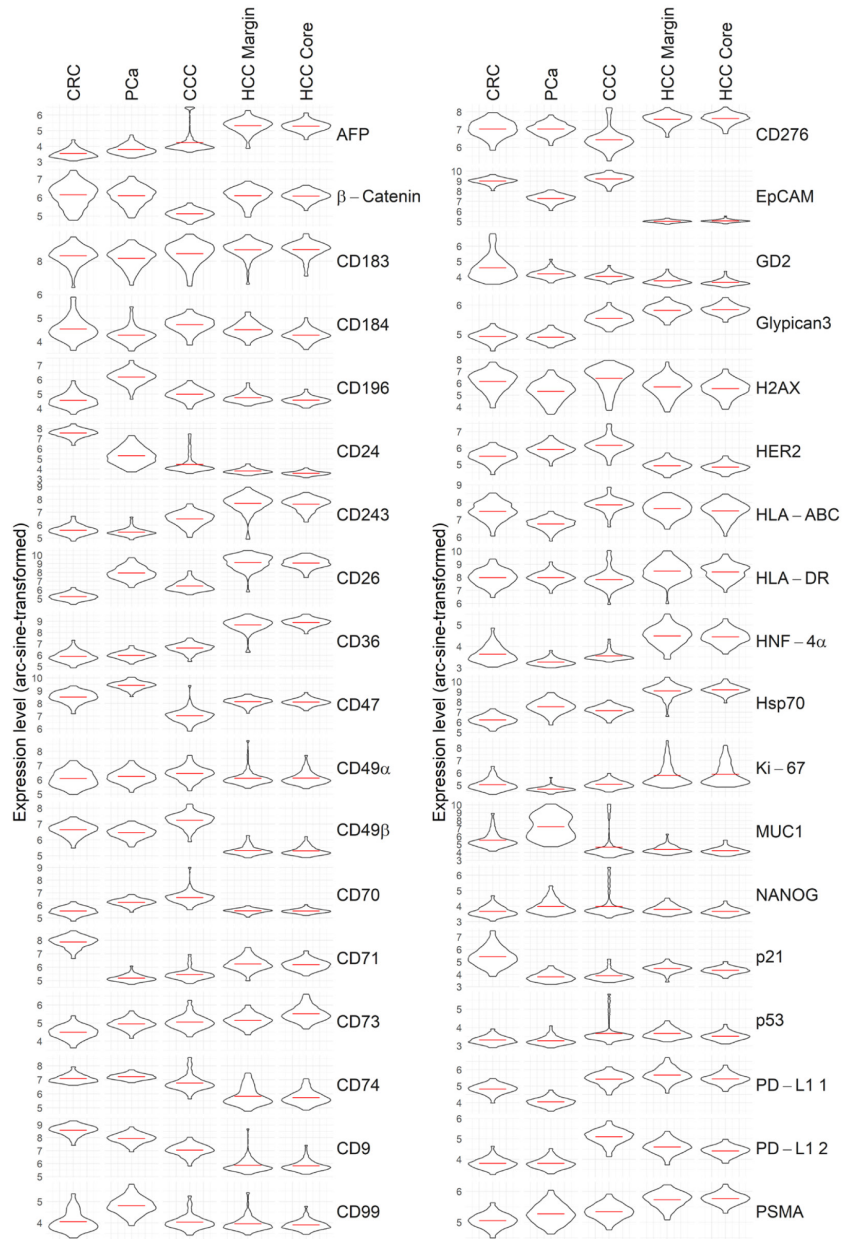

Figure S3

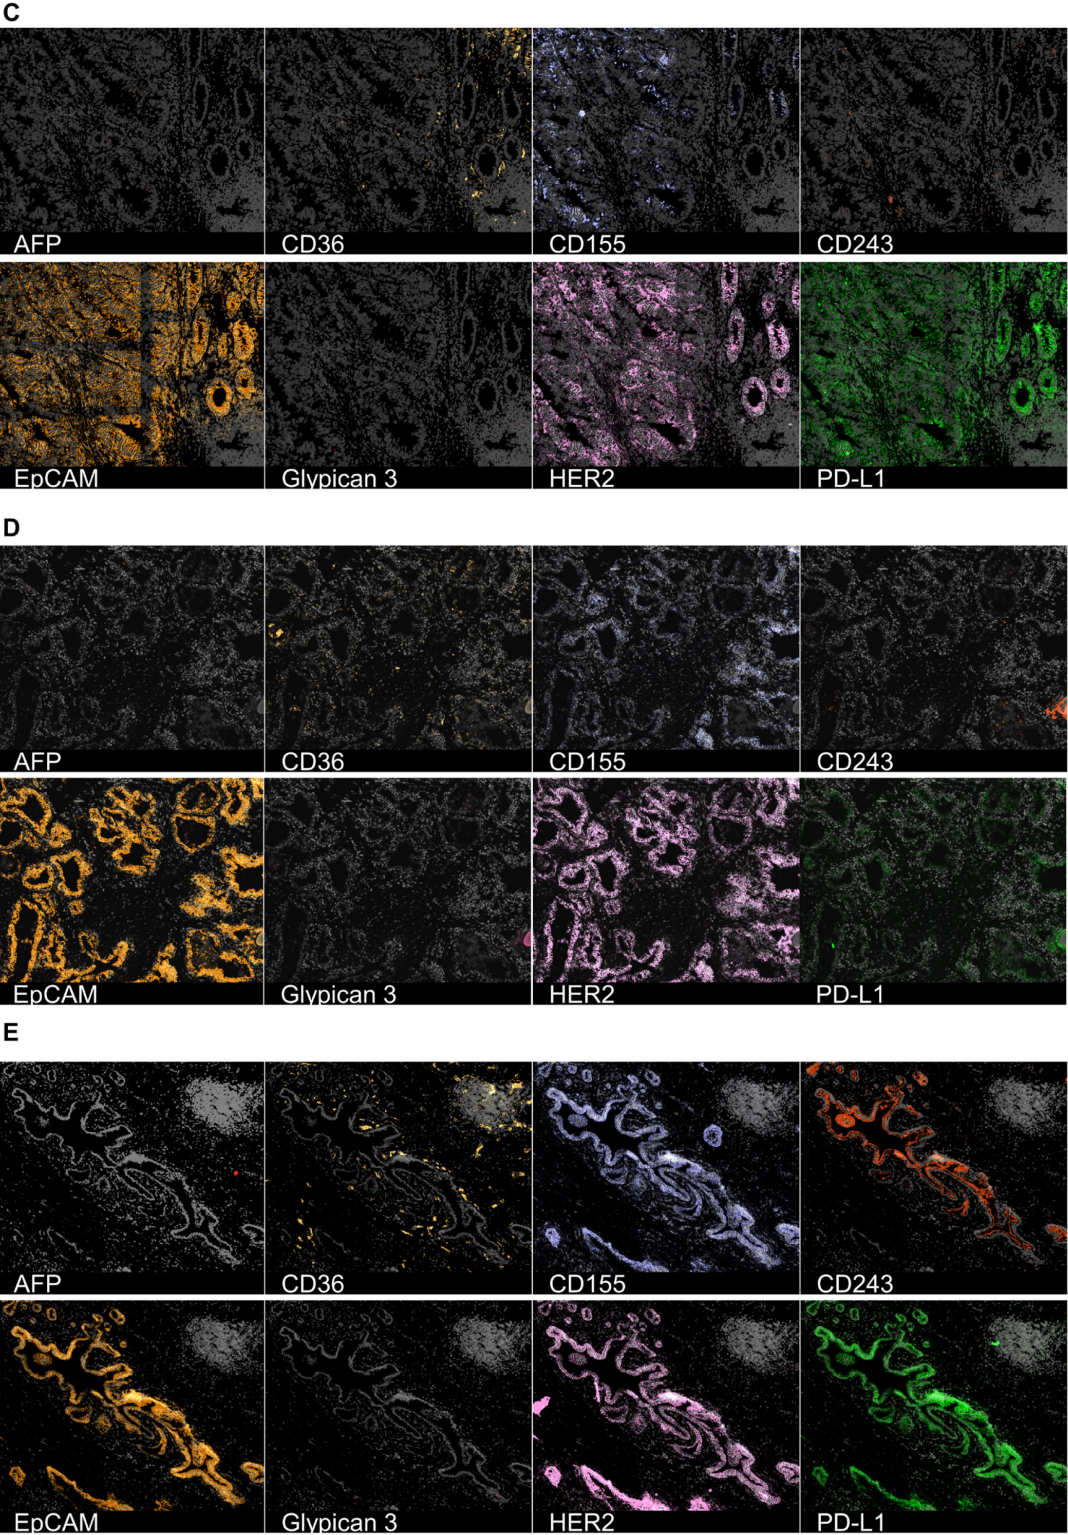



Figure S3

F

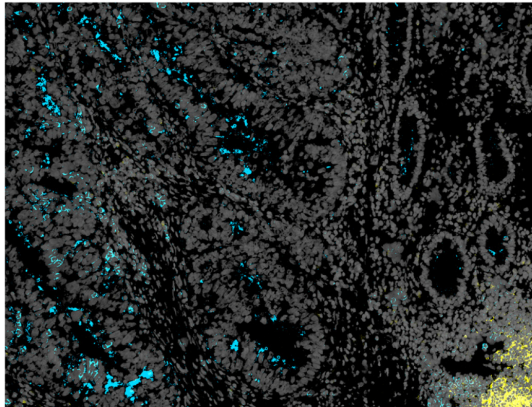

● CD21 ● CD24

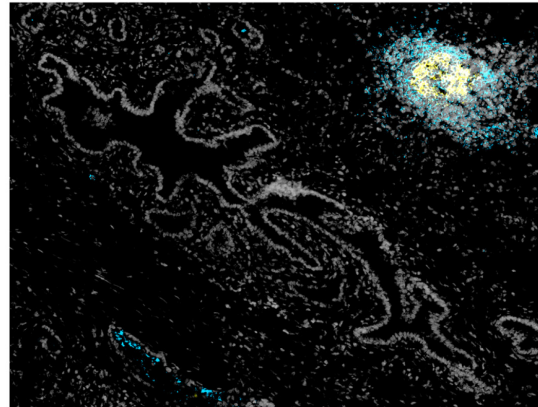

● CD21 ● CD24

G

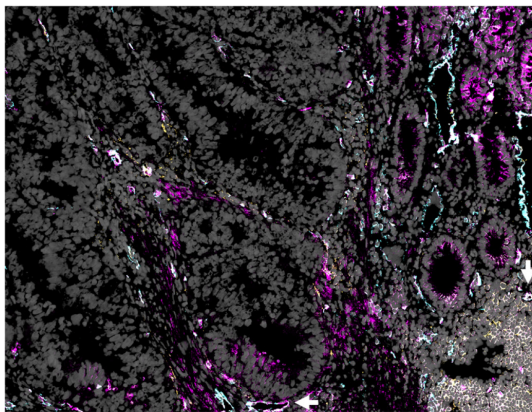

● CD31 ● CD34 ● CD54

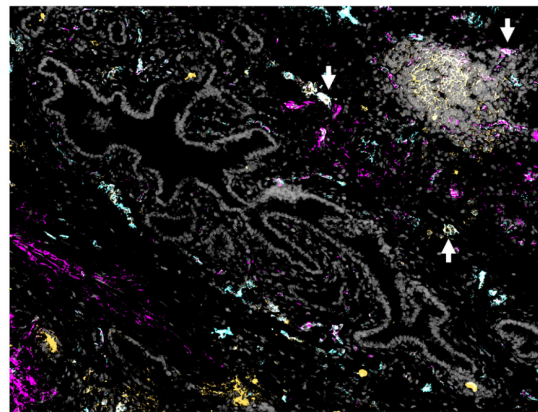

● CD31 ● CD34 ● CD54

**Supplementary Figure 3: Deep spatial phenotyping of CRC, PCa, and CCC malignant, stromal, and immune cells.** **A** H&E staining after 89-92 MICS cycles of CRC, PCa, and CCC. **B** 36 different cancer-associated protein marker expression levels depicted as violin plots, showing the tumor heterogeneity between the analyzed entities. **C-E** Staining of immunotherapeutic targets and tumor markers (AFP, CD36, CD155, CD243, EpCAM, Glypican 3, HER2, and PD-L1) on **C** CRC, **D** PCa, and **E** CCC. **F** TLS with GC reaction, shown by CD21<sup>+</sup> B cells. **G** HEV formation surrounding the TLS is depicted by CD34<sup>+</sup>/CD54<sup>+</sup> endothelial cells and highlighted by white arrowheads.

ROI sizes: CRC: 975 x 747  $\mu$ m, PCa: 974 x 747  $\mu$ m, CCC: 974 x 769  $\mu$ m.
