# Supplementary material for: Unveiling spatial complexity in solid tumor immune microenvironments through multiplexed imaging
Source: PubMed Central journal article supplement (PMC10985204; doi:10.3389/fimmu.2024.1383932), 2024-03-19
Supplement: Image_4.pdf [file Image_4.pdf]

Figure S4

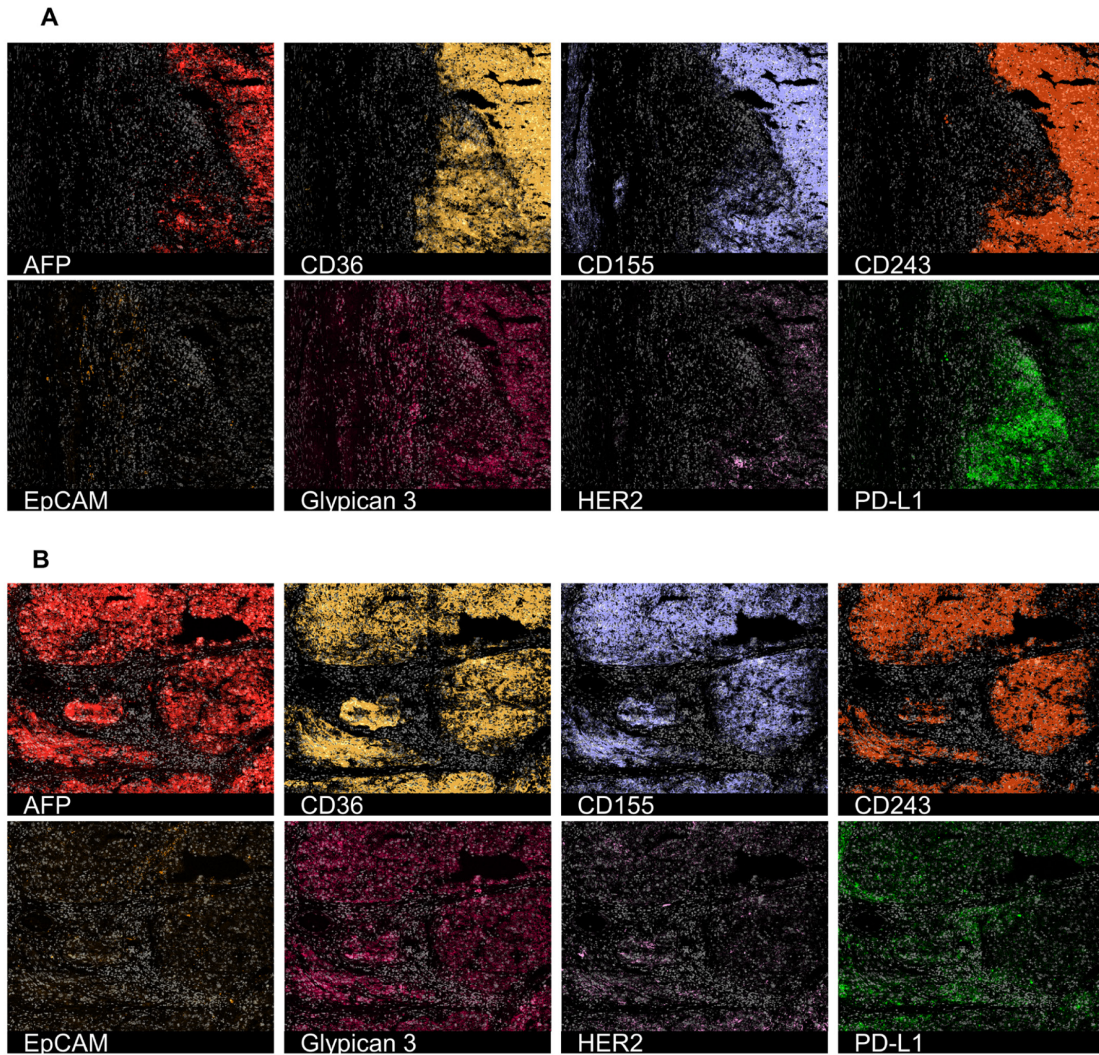

**Supplementary Figure 4: Spatial HCC tumor characterization.** Staining of immunotherapeutic targets and tumor markers (AFP, CD36, CD155, CD243, EpCAM, Glypican 3, HER2, and PD-L1) on HCC tumor margin (**A**) and tumor core (**B**).

ROI sizes: Tumor margin (ROI15) and tumor core (ROI16): 975 x 769  $\mu\text{m}$ .
