# Supplementary material for: Unveiling spatial complexity in solid tumor immune microenvironments through multiplexed imaging
Source: PubMed Central journal article supplement (PMC10985204; doi:10.3389/fimmu.2024.1383932), 2024-03-19
Supplement: Image_5.pdf [file Image_5.pdf]

**Figure S5**

**A**

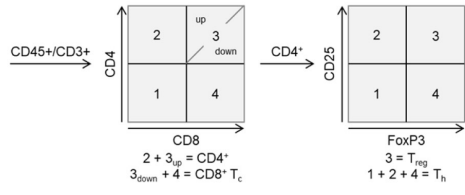

**B**

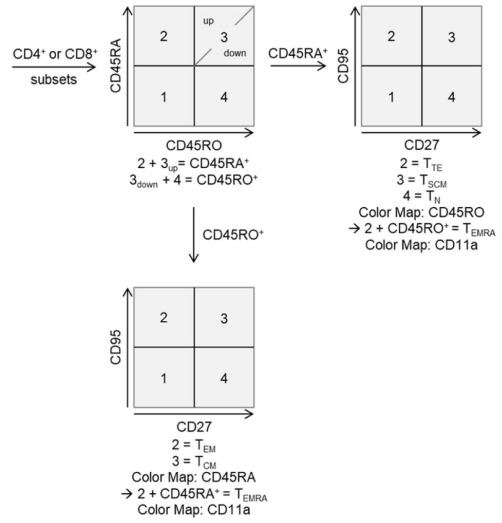

**C**

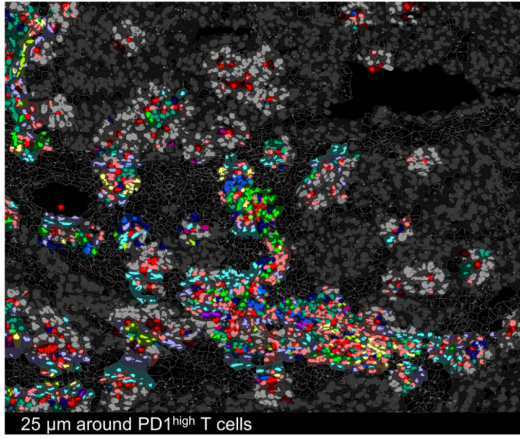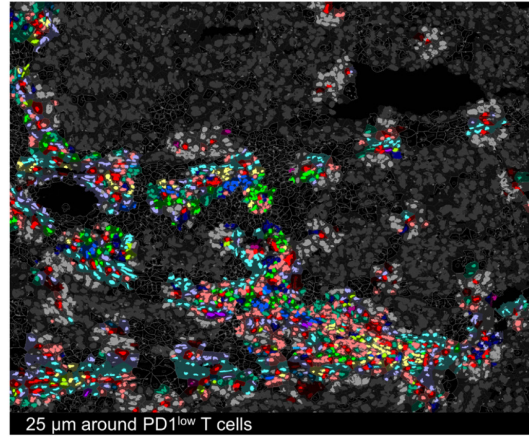

**D**

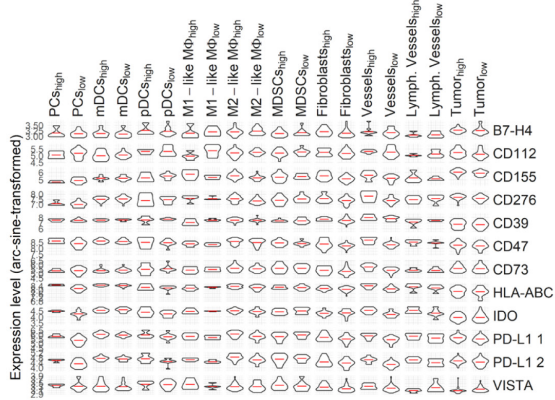

**E**

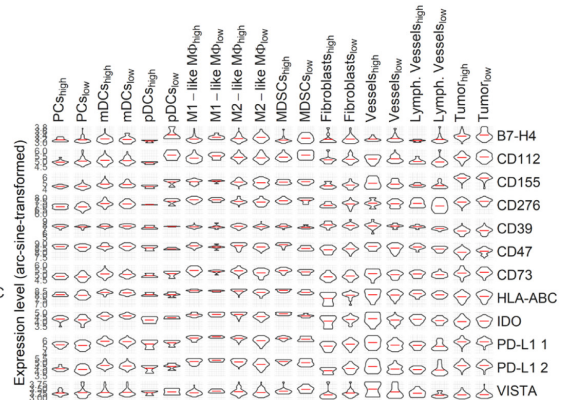

**Supplementary Figure 5: T cell differentiation subtype gating scheme and T cell neighborhood analysis in HCC.** **A** Expert-based gating analysis for identification of Th, Tc, and Treg out of a CD45<sup>+</sup>/CD3<sup>+</sup> population. **B** Expert-based gating analysis for T cell differentiation subsets using the expression levels of CR45RA, CD45RO, CD27, CD95, and CD11a. Six T cell differentiation subsets were defined: naïve T<sub>N</sub> cells, stem cell-like memory T<sub>SCM</sub> cells, central memory T<sub>CM</sub> cells, effector memory T<sub>EM</sub>, effector memory cells re-expressing CD45RA T<sub>EMRA</sub>, and terminally differentiated effector T<sub>TE</sub> cells. **C** Exemplary neighborhood analysis of PD1<sup>high/low</sup> T cells in the HCC tumor core by applying a 25 µm range. Due to a bigger range, neighboring cells of both T cells populations overlap and the informative value fades. **D, E** Expression profiles of 12 immune checkpoint or immunomodulatory molecules (B7-H4, CD112, CD155, CD276, CD39, CD47, CD73, HLA-ABC, IDO, PD-L1 1, PD-L1 2, and VISTA) for PCs, mDCs, pDCs, M1-like MΦ, M2-like MΦ, MDSCs, fibroblasts, vessel, lymphatic vessels, and tumor cells in a 5 µm range around PD1<sup>high/low</sup> T cells in tumor core (**D**) and tumor margin (**E**).

ROI sizes: Tumor margin (ROI15) and tumor core (ROI16): 975 x 769 µm.
